# Supplementary material
Source: PubMed Central journal article supplement (PMC7111715)

Fig. S1

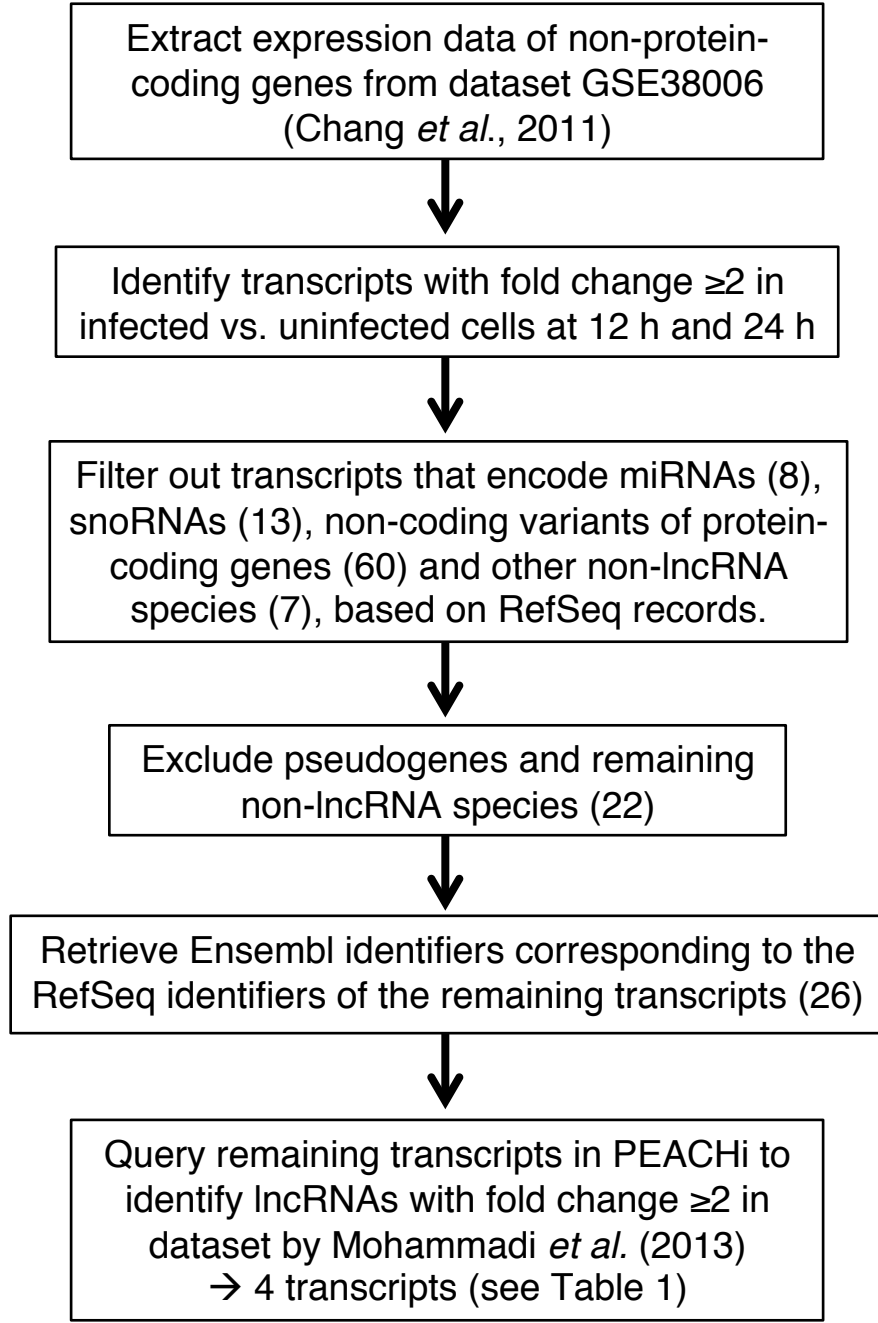

Supplement: mmc1.pdf [file mmc1.pdf]

Fig. S2

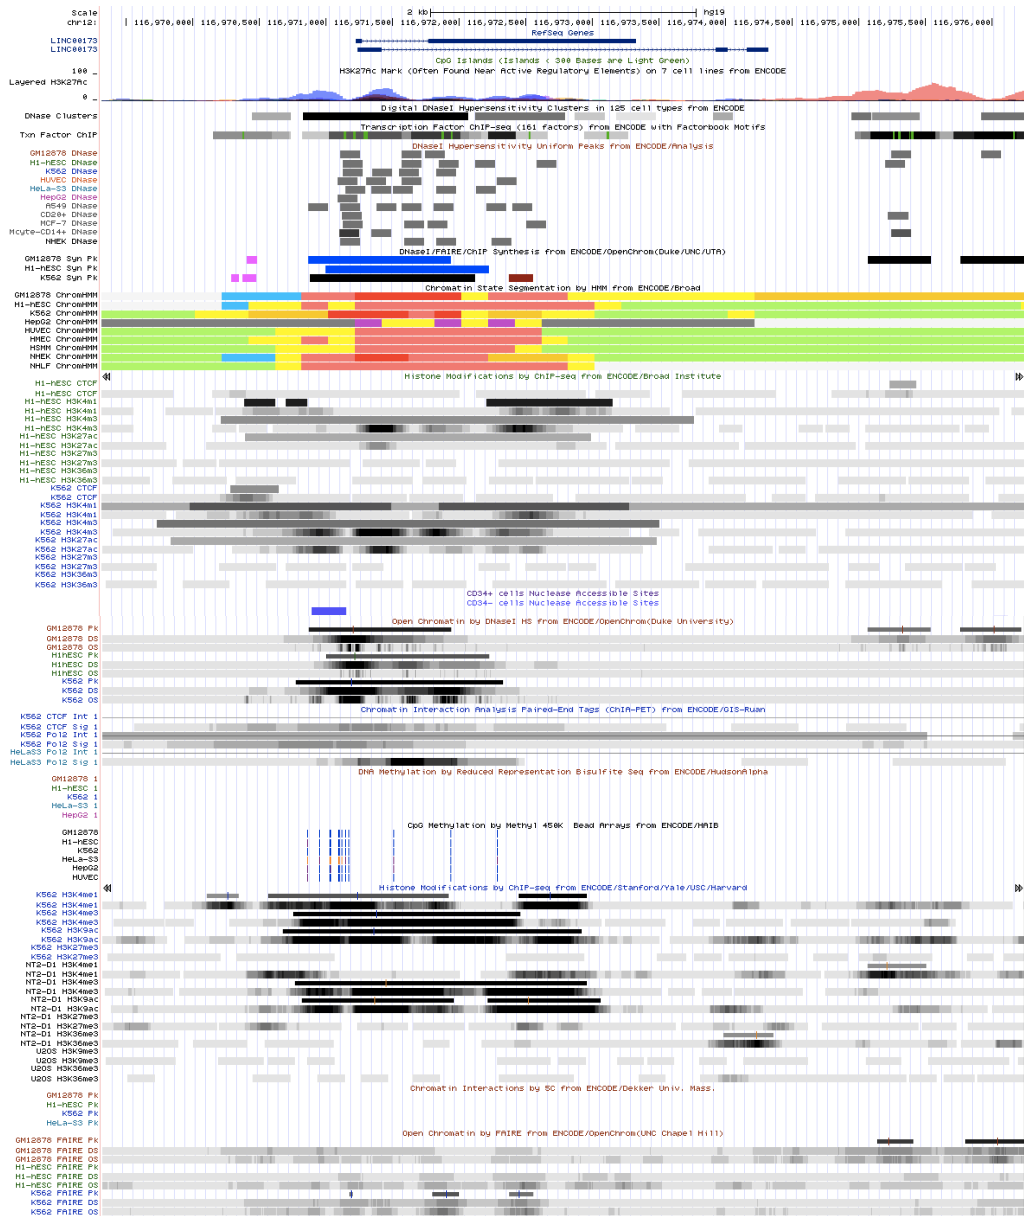

Supplement: mmc2.pdf [file mmc2.pdf]

Fig. S4

A

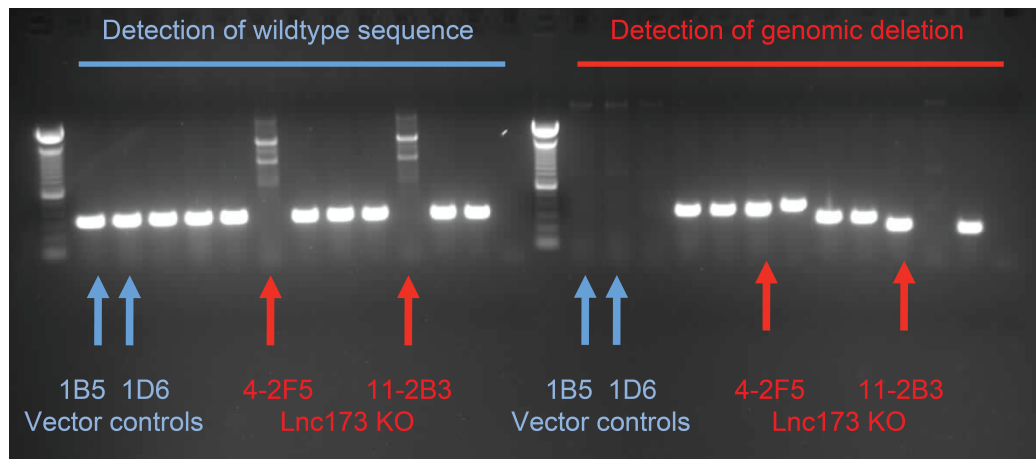

B

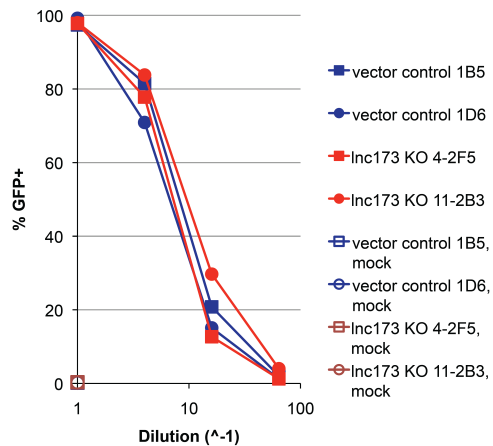

C

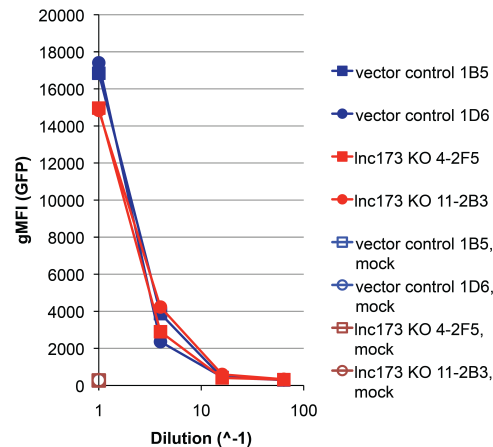

Supplement: mmc4.pdf [file mmc4.pdf]

Fig. S5

**A**

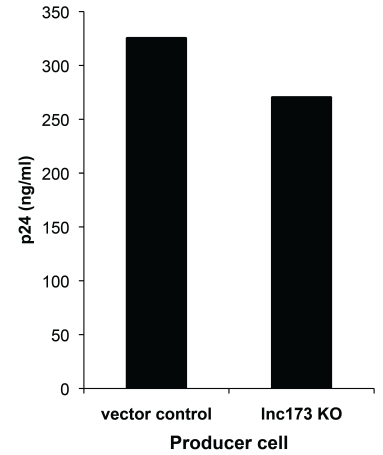

**B**

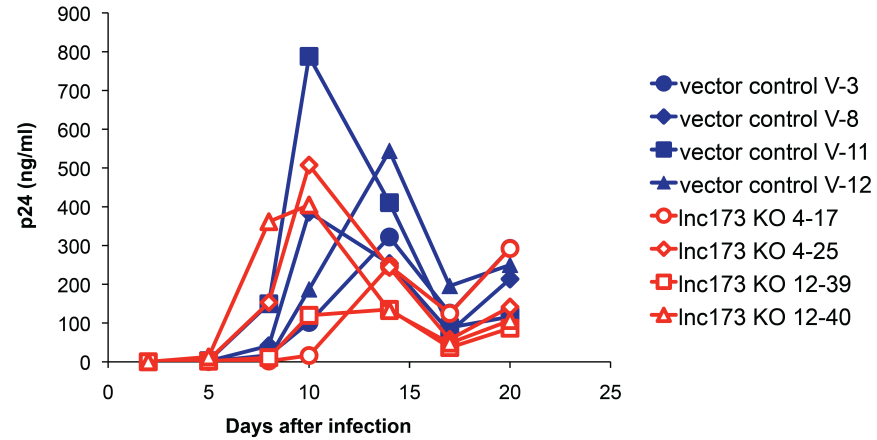

Supplement: mmc5.pdf [file mmc5.pdf]

Fig. S6

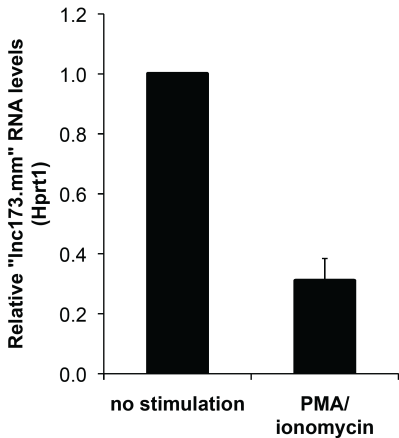

Supplement: mmc6.pdf [file mmc6.pdf]

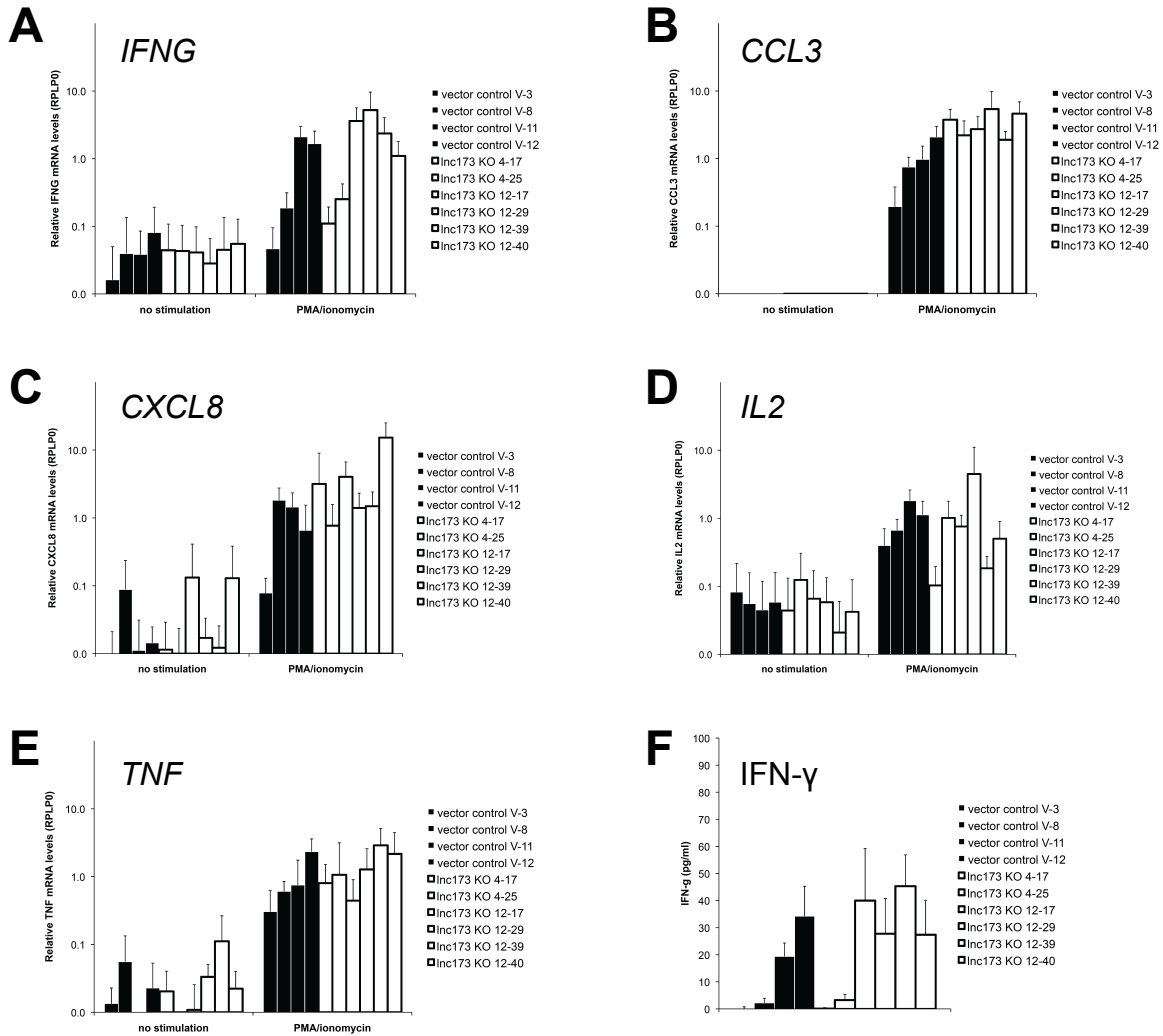

Supplement: mmc7.pdf [file mmc7.pdf]
